# Supplementary material for: Molecular and Serological Detection of Anaplasma phagocytophilum in Dogs from Germany (2008–2020)
Source: MDPI journal article supplement (doi:10.3390/ani13040720), 2023-02-17
Supplement: s1 [file s1]

# Baden-Wuerttemberg: PCR

| Year * PCR <sup>a</sup> |   |  | PCR      |          | total  |
|-------------------------|---|--|----------|----------|--------|
| Year                    |   |  | negative | positive |        |
| 2008                    | N |  | 81       | 1        | 82     |
|                         | % |  | 98.8%    | 1.2%     | 100.0% |
| 2009                    | N |  | 113      | 7        | 120    |
|                         | % |  | 94.2%    | 5.8%     | 100.0% |
| 2010                    | N |  | 120      | 5        | 125    |
|                         | % |  | 96.0%    | 4.0%     | 100.0% |
| 2011                    | N |  | 115      | 6        | 121    |
|                         | % |  | 95.0%    | 5.0%     | 100.0% |
| 2012                    | N |  | 150      | 11       | 161    |
|                         | % |  | 93.2%    | 6.8%     | 100.0% |
| 2013                    | N |  | 110      | 3        | 113    |
|                         | % |  | 97.3%    | 2.7%     | 100.0% |
| 2014                    | N |  | 139      | 3        | 142    |
|                         | % |  | 97.9%    | 2.1%     | 100.0% |
| 2015                    | N |  | 132      | 5        | 137    |
|                         | % |  | 96.4%    | 3.6%     | 100.0% |
| 2016                    | N |  | 195      | 10       | 205    |
|                         | % |  | 95.1%    | 4.9%     | 100.0% |
| 2017                    | N |  | 283      | 6        | 289    |
|                         | % |  | 97.9%    | 2.1%     | 100.0% |
| 2018                    | N |  | 309      | 11       | 320    |
|                         | % |  | 96.6%    | 3.4%     | 100.0% |
| 2019                    | N |  | 398      | 13       | 411    |
|                         | % |  | 96.8%    | 3.2%     | 100.0% |
| 2020                    | N |  | 624      | 37       | 661    |
|                         | % |  | 94.4%    | 5.6%     | 100.0% |
| Total                   | N |  | 2,769    | 118      | 2,887  |
|                         | % |  | 95.9%    | 4.1%     | 100.0% |

a. Federal State = Baden-Wuerttemberg

Baden-Wuerttemberg: IFAT/ELISA

| Year * IFAT/ELISA <sup>a</sup> |      |   | IFAT/ELISA |          | total  |
|--------------------------------|------|---|------------|----------|--------|
|                                |      |   | negative   | positive |        |
| Year                           | 2008 | N | 278        | 39       | 317    |
|                                |      | % | 87.7%      | 12.3%    | 100.0% |
|                                | 2009 | N | 382        | 101      | 483    |
|                                |      | % | 79.1%      | 20.9%    | 100.0% |
|                                | 2010 | N | 373        | 93       | 466    |
|                                |      | % | 80.0%      | 20.0%    | 100.0% |
|                                | 2011 | N | 401        | 108      | 509    |
|                                |      | % | 78.8%      | 21.2%    | 100.0% |
|                                | 2012 | N | 437        | 113      | 550    |
|                                |      | % | 79.5%      | 20.5%    | 100.0% |
|                                | 2013 | N | 435        | 120      | 555    |
|                                |      | % | 78.4%      | 21.6%    | 100.0% |
|                                | 2014 | N | 582        | 92       | 674    |
|                                |      | % | 86.4%      | 13.6%    | 100.0% |
|                                | 2015 | N | 592        | 61       | 653    |
|                                |      | % | 90.7%      | 9.3%     | 100.0% |
|                                | 2016 | N | 644        | 101      | 745    |
|                                |      | % | 86.4%      | 13.6%    | 100.0% |
|                                | 2017 | N | 538        | 279      | 817    |
|                                |      | % | 65.9%      | 34.1%    | 100.0% |
|                                | 2018 | N | 643        | 305      | 948    |
|                                |      | % | 67.8%      | 32.2%    | 100.0% |
|                                | 2019 | N | 697        | 274      | 971    |
|                                |      | % | 71.8%      | 28.2%    | 100.0% |
|                                | 2020 | N | 855        | 425      | 1,280  |
|                                |      | % | 66.8%      | 33.2%    | 100.0% |
| Gesamt                         |      | N | 6,857      | 2,111    | 8,968  |
|                                |      | % | 76.5%      | 23.5%    | 100.0% |

a. Federal State = Baden-Wuerttemberg

Bavaria: PCR

| Year * PCR <sup>a</sup> |   |  | PCR      |          | total  |
|-------------------------|---|--|----------|----------|--------|
| Year                    |   |  | negative | positive |        |
| 2008                    | N |  | 75       | 7        | 82     |
|                         | % |  | 91.5%    | 8.5%     | 100.0% |
| 2009                    | N |  | 137      | 8        | 145    |
|                         | % |  | 94.5%    | 5.5%     | 100.0% |
| 2010                    | N |  | 109      | 8        | 117    |
|                         | % |  | 93.2%    | 6.8%     | 100.0% |
| 2011                    | N |  | 86       | 5        | 91     |
|                         | % |  | 94.5%    | 5.5%     | 100.0% |
| 2012                    | N |  | 138      | 5        | 143    |
|                         | % |  | 96.5%    | 3.5%     | 100.0% |
| 2013                    | N |  | 179      | 5        | 184    |
|                         | % |  | 97.3%    | 2.7%     | 100.0% |
| 2014                    | N |  | 221      | 9        | 230    |
|                         | % |  | 96.1%    | 3.9%     | 100.0% |
| 2015                    | N |  | 140      | 11       | 151    |
|                         | % |  | 92.7%    | 7.3%     | 100.0% |
| 2016                    | N |  | 172      | 1        | 173    |
|                         | % |  | 99.4%    | 0.6%     | 100.0% |
| 2017                    | N |  | 279      | 14       | 293    |
|                         | % |  | 95.2%    | 4.8%     | 100.0% |
| 2018                    | N |  | 305      | 14       | 319    |
|                         | % |  | 95.6%    | 4.4%     | 100.0% |
| 2019                    | N |  | 365      | 21       | 386    |
|                         | % |  | 94.6%    | 5.4%     | 100.0% |
| 2020                    | N |  | 376      | 31       | 407    |
|                         | % |  | 92.4%    | 7.6%     | 100.0% |
| Total                   | N |  | 2,582    | 139      | 2,721  |
|                         | % |  | 94.9%    | 5.1%     | 100.0% |

a. Federal State = Bavaria

Bavaria: IFAT/ELISA

| Year * IFAT/ELISA <sup>a</sup> |      |   | IFAT/ELISA |          | total  |
|--------------------------------|------|---|------------|----------|--------|
|                                |      |   | negative   | positive |        |
| Year                           | 2008 | N | 277        | 95       | 372    |
|                                |      | % | 74.5%      | 25.5%    | 100.0% |
|                                | 2009 | N | 256        | 143      | 399    |
|                                |      | % | 64.2%      | 35.8%    | 100.0% |
|                                | 2010 | N | 210        | 114      | 324    |
|                                |      | % | 64.8%      | 35.2%    | 100.0% |
|                                | 2011 | N | 319        | 156      | 475    |
|                                |      | % | 67.2%      | 32.8%    | 100.0% |
|                                | 2012 | N | 334        | 185      | 519    |
|                                |      | % | 64.4%      | 35.6%    | 100.0% |
|                                | 2013 | N | 325        | 198      | 523    |
|                                |      | % | 62.1%      | 37.9%    | 100.0% |
|                                | 2014 | N | 439        | 143      | 582    |
|                                |      | % | 75.4%      | 24.6%    | 100.0% |
|                                | 2015 | N | 451        | 93       | 544    |
|                                |      | % | 82.9%      | 17.1%    | 100.0% |
|                                | 2016 | N | 446        | 129      | 575    |
|                                |      | % | 77.6%      | 22.4%    | 100.0% |
|                                | 2017 | N | 407        | 314      | 721    |
|                                |      | % | 56.4%      | 43.6%    | 100.0% |
|                                | 2018 | N | 414        | 286      | 700    |
|                                |      | % | 59.1%      | 40.9%    | 100.0% |
|                                | 2019 | N | 369        | 286      | 655    |
|                                |      | % | 56.3%      | 43.7%    | 100.0% |
|                                | 2020 | N | 457        | 369      | 826    |
|                                |      | % | 55.3%      | 44.7%    | 100.0% |
| Total                          |      | N | 4,704      | 2,511    | 7,215  |
|                                |      | % | 65.2%      | 34.8%    | 100.0% |

a. Federal State = Bavaria

Berlin-Brandenburg: PCR

| Year * PCR <sup>a</sup> |   |  | PCR      |          | total  |
|-------------------------|---|--|----------|----------|--------|
| Year                    |   |  | negative | positive |        |
| 2008                    | N |  | 24       | 2        | 26     |
|                         | % |  | 92.3%    | 7.7%     | 100.0% |
| 2009                    | N |  | 51       | 1        | 52     |
|                         | % |  | 98.1%    | 1.9%     | 100.0% |
| 2010                    | N |  | 59       | 2        | 61     |
|                         | % |  | 96.7%    | 3.3%     | 100.0% |
| 2011                    | N |  | 92       | 10       | 102    |
|                         | % |  | 90.2%    | 9.8%     | 100.0% |
| 2012                    | N |  | 133      | 4        | 137    |
|                         | % |  | 97.1%    | 2.9%     | 100.0% |
| 2013                    | N |  | 186      | 9        | 195    |
|                         | % |  | 95.4%    | 4.6%     | 100.0% |
| 2014                    | N |  | 247      | 14       | 261    |
|                         | % |  | 94.6%    | 5.4%     | 100.0% |
| 2015                    | N |  | 247      | 24       | 271    |
|                         | % |  | 91.1%    | 8.9%     | 100.0% |
| 2016                    | N |  | 305      | 32       | 337    |
|                         | % |  | 90.5%    | 9.5%     | 100.0% |
| 2017                    | N |  | 321      | 42       | 363    |
|                         | % |  | 88.4%    | 11.6%    | 100.0% |
| 2018                    | N |  | 339      | 33       | 372    |
|                         | % |  | 91.1%    | 8.9%     | 100.0% |
| 2019                    | N |  | 389      | 34       | 423    |
|                         | % |  | 92.0%    | 8.0%     | 100.0% |
| 2020                    | N |  | 414      | 24       | 438    |
|                         | % |  | 94.5%    | 5.5%     | 100.0% |
| Total                   | N |  | 2,807    | 231      | 3,038  |
|                         | % |  | 92.4%    | 7.6%     | 100.0% |

a. Federal State = Berlin-Brandenburg

Berlin-Brandenburg: IFAT/ELISA

| Year * IFAT/ELISA <sup>a</sup> |   |  | IFAT/ELISA |          | total  |
|--------------------------------|---|--|------------|----------|--------|
| Year                           |   |  | negative   | positive |        |
| 2008                           | N |  | 27         | 1        | 28     |
|                                | % |  | 96.4%      | 3.6%     | 100.0% |
| 2009                           | N |  | 43         | 8        | 51     |
|                                | % |  | 84.3%      | 15.7%    | 100.0% |
| 2010                           | N |  | 53         | 30       | 83     |
|                                | % |  | 63.9%      | 36.1%    | 100.0% |
| 2011                           | N |  | 78         | 45       | 123    |
|                                | % |  | 63.4%      | 36.6%    | 100.0% |
| 2012                           | N |  | 133        | 51       | 184    |
|                                | % |  | 72.3%      | 27.7%    | 100.0% |
| 2013                           | N |  | 145        | 64       | 209    |
|                                | % |  | 69.4%      | 30.6%    | 100.0% |
| 2014                           | N |  | 240        | 47       | 287    |
|                                | % |  | 83.6%      | 16.4%    | 100.0% |
| 2015                           | N |  | 242        | 46       | 288    |
|                                | % |  | 84.0%      | 16.0%    | 100.0% |
| 2016                           | N |  | 256        | 66       | 322    |
|                                | % |  | 79.5%      | 20.5%    | 100.0% |
| 2017                           | N |  | 230        | 151      | 381    |
|                                | % |  | 60.4%      | 39.6%    | 100.0% |
| 2018                           | N |  | 251        | 148      | 399    |
|                                | % |  | 62.9%      | 37.1%    | 100.0% |
| 2019                           | N |  | 323        | 186      | 509    |
|                                | % |  | 63.5%      | 36.5%    | 100.0% |
| 2020                           | N |  | 392        | 219      | 611    |
|                                | % |  | 64.2%      | 35.8%    | 100.0% |
| Total                          | N |  | 2,413      | 1,062    | 3,475  |
|                                | % |  | 69.4%      | 30.6%    | 100.0% |

a. Federal State = Berlin-Brandenburg

Hesse: PCR

| Year * PCR <sup>a</sup> |   |  | PCR      |          | total  |
|-------------------------|---|--|----------|----------|--------|
| Year                    |   |  | negative | positive |        |
| 2008                    | N |  | 82       | 4        | 86     |
|                         | % |  | 95.3%    | 4.7%     | 100.0% |
| 2009                    | N |  | 128      | 6        | 134    |
|                         | % |  | 95.5%    | 4.5%     | 100.0% |
| 2010                    | N |  | 133      | 1        | 134    |
|                         | % |  | 99.3%    | 0.7%     | 100.0% |
| 2011                    | N |  | 102      | 3        | 105    |
|                         | % |  | 97.1%    | 2.9%     | 100.0% |
| 2012                    | N |  | 107      | 7        | 114    |
|                         | % |  | 93.9%    | 6.1%     | 100.0% |
| 2013                    | N |  | 95       | 2        | 97     |
|                         | % |  | 97.9%    | 2.1%     | 100.0% |
| 2014                    | N |  | 130      | 5        | 135    |
|                         | % |  | 96.3%    | 3.7%     | 100.0% |
| 2015                    | N |  | 140      | 7        | 147    |
|                         | % |  | 95.2%    | 4.8%     | 100.0% |
| 2016                    | N |  | 224      | 7        | 231    |
|                         | % |  | 97.0%    | 3.0%     | 100.0% |
| 2017                    | N |  | 252      | 9        | 261    |
|                         | % |  | 96.6%    | 3.4%     | 100.0% |
| 2018                    | N |  | 295      | 12       | 307    |
|                         | % |  | 96.1%    | 3.9%     | 100.0% |
| 2019                    | N |  | 301      | 6        | 307    |
|                         | % |  | 98.0%    | 2.0%     | 100.0% |
| 2020                    | N |  | 433      | 5        | 438    |
|                         | % |  | 98.9%    | 1.1%     | 100.0% |
| Total                   | N |  | 2,422    | 74       | 2,496  |
|                         | % |  | 97.0%    | 3.0%     | 100.0% |

a. Federal State = Hesse

Hesse: IFAT/ELISA

| Year * IFAT/ELISA <sup>a</sup> |      |   | IFAT/ELISA |          | total  |
|--------------------------------|------|---|------------|----------|--------|
|                                |      |   | negative   | positive |        |
| Year                           | 2008 | N | 325        | 53       | 378    |
|                                |      | % | 86.0%      | 14.0%    | 100.0% |
|                                | 2009 | N | 381        | 112      | 493    |
|                                |      | % | 77.3%      | 22.7%    | 100.0% |
|                                | 2010 | N | 286        | 98       | 384    |
|                                |      | % | 74.5%      | 25.5%    | 100.0% |
|                                | 2011 | N | 387        | 143      | 530    |
|                                |      | % | 73.0%      | 27.0%    | 100.0% |
|                                | 2012 | N | 477        | 143      | 620    |
|                                |      | % | 76.9%      | 23.1%    | 100.0% |
|                                | 2013 | N | 507        | 113      | 620    |
|                                |      | % | 81.8%      | 18.2%    | 100.0% |
|                                | 2014 | N | 759        | 107      | 866    |
|                                |      | % | 87.6%      | 12.4%    | 100.0% |
|                                | 2015 | N | 866        | 70       | 936    |
|                                |      | % | 92.5%      | 7.5%     | 100.0% |
|                                | 2016 | N | 882        | 98       | 980    |
|                                |      | % | 90.0%      | 10.0%    | 100.0% |
|                                | 2017 | N | 765        | 319      | 1,084  |
|                                |      | % | 70.6%      | 29.4%    | 100.0% |
|                                | 2018 | N | 616        | 211      | 827    |
|                                |      | % | 74.5%      | 25.5%    | 100.0% |
|                                | 2019 | N | 761        | 215      | 976    |
|                                |      | % | 78.0%      | 22.0%    | 100.0% |
|                                | 2020 | N | 784        | 261      | 1,045  |
|                                |      | % | 75.0%      | 25.0%    | 100.0% |
| Total                          |      | N | 7,796      | 1,943    | 9,739  |
|                                |      | % | 80.0%      | 20.0%    | 100.0% |

a. Federal State = Hesse



Lower Saxony/Bremen: PCR

| Year * PCR <sup>a</sup> |   |  | PCR      |          | total  |
|-------------------------|---|--|----------|----------|--------|
| Year                    |   |  | negative | positive |        |
| 2008                    | N |  | 96       | 6        | 102    |
|                         | % |  | 94.1%    | 5.9%     | 100.0% |
| 2009                    | N |  | 147      | 6        | 153    |
|                         | % |  | 96.1%    | 3.9%     | 100.0% |
| 2010                    | N |  | 128      | 4        | 132    |
|                         | % |  | 97.0%    | 3.0%     | 100.0% |
| 2011                    | N |  | 148      | 6        | 154    |
|                         | % |  | 96.1%    | 3.9%     | 100.0% |
| 2012                    | N |  | 172      | 4        | 176    |
|                         | % |  | 97.7%    | 2.3%     | 100.0% |
| 2013                    | N |  | 188      | 8        | 196    |
|                         | % |  | 95.9%    | 4.1%     | 100.0% |
| 2014                    | N |  | 243      | 20       | 263    |
|                         | % |  | 92.4%    | 7.6%     | 100.0% |
| 2015                    | N |  | 318      | 21       | 339    |
|                         | % |  | 93.8%    | 6.2%     | 100.0% |
| 2016                    | N |  | 405      | 24       | 429    |
|                         | % |  | 94.4%    | 5.6%     | 100.0% |
| 2017                    | N |  | 466      | 33       | 499    |
|                         | % |  | 93.4%    | 6.6%     | 100.0% |
| 2018                    | N |  | 588      | 34       | 622    |
|                         | % |  | 94.5%    | 5.5%     | 100.0% |
| 2019                    | N |  | 563      | 38       | 601    |
|                         | % |  | 93.7%    | 6.3%     | 100.0% |
| 2020                    | N |  | 632      | 43       | 675    |
|                         | % |  | 93.6%    | 6.4%     | 100.0% |
| Total                   | N |  | 4,094    | 247      | 4,341  |
|                         | % |  | 94.3%    | 5.7%     | 100.0% |

a. Federal State = Lower Saxony/Bremen

Lower Saxony/Bremen: IFAT/ELISA

| Year * IFAT/ELISA <sup>a</sup> |      |   | IFAT/ELISA |          | total  |
|--------------------------------|------|---|------------|----------|--------|
|                                |      |   | negative   | positive |        |
| Year                           | 2008 | N | 338        | 85       | 423    |
|                                |      | % | 79.9%      | 20.1%    | 100.0% |
|                                | 2009 | N | 403        | 175      | 578    |
|                                |      | % | 69.7%      | 30.3%    | 100.0% |
|                                | 2010 | N | 377        | 217      | 594    |
|                                |      | % | 63.5%      | 36.5%    | 100.0% |
|                                | 2011 | N | 587        | 332      | 919    |
|                                |      | % | 63.9%      | 36.1%    | 100.0% |
|                                | 2012 | N | 773        | 435      | 1,208  |
|                                |      | % | 64.0%      | 36.0%    | 100.0% |
|                                | 2013 | N | 893        | 458      | 1,351  |
|                                |      | % | 66.1%      | 33.9%    | 100.0% |
|                                | 2014 | N | 1,050      | 389      | 1,439  |
|                                |      | % | 73.0%      | 27.0%    | 100.0% |
|                                | 2015 | N | 1,204      | 284      | 1,488  |
|                                |      | % | 80.9%      | 19.1%    | 100.0% |
|                                | 2016 | N | 1,183      | 266      | 1,449  |
|                                |      | % | 81.6%      | 18.4%    | 100.0% |
|                                | 2017 | N | 980        | 759      | 1,739  |
|                                |      | % | 56.4%      | 43.6%    | 100.0% |
|                                | 2018 | N | 1,078      | 812      | 1,890  |
|                                |      | % | 57.0%      | 43.0%    | 100.0% |
|                                | 2019 | N | 1,235      | 692      | 1,927  |
|                                |      | % | 64.1%      | 35.9%    | 100.0% |
|                                | 2020 | N | 1,222      | 829      | 2,051  |
|                                |      | % | 59.6%      | 40.4%    | 100.0% |
| Total                          |      | N | 11,323     | 5,733    | 17,056 |
|                                |      | % | 66.4%      | 33.6%    | 100.0% |

a. Federal State = Lower Saxony/Bremen

Mecklenburg Western Pomerania: PCR

| Year * PCR <sup>a</sup> |   |  | PCR      |          | total  |
|-------------------------|---|--|----------|----------|--------|
| Year                    |   |  | negative | positive |        |
| 2008                    | N |  | 8        | 1        | 9      |
|                         | % |  | 88.9%    | 11.1%    | 100.0% |
| 2009                    | N |  | 12       | 0        | 12     |
|                         | % |  | 100.0%   | 0.0%     | 100.0% |
| 2010                    | N |  | 6        | 1        | 7      |
|                         | % |  | 85.7%    | 14.3%    | 100.0% |
| 2011                    | N |  | 5        | 1        | 6      |
|                         | % |  | 83.3%    | 16.7%    | 100.0% |
| 2012                    | N |  | 13       | 0        | 13     |
|                         | % |  | 100.0%   | 0.0%     | 100.0% |
| 2013                    | N |  | 16       | 0        | 16     |
|                         | % |  | 100.0%   | 0.0%     | 100.0% |
| 2014                    | N |  | 23       | 0        | 23     |
|                         | % |  | 100.0%   | 0.0%     | 100.0% |
| 2015                    | N |  | 26       | 1        | 27     |
|                         | % |  | 96.3%    | 3.7%     | 100.0% |
| 2016                    | N |  | 50       | 4        | 54     |
|                         | % |  | 92.6%    | 7.4%     | 100.0% |
| 2017                    | N |  | 41       | 1        | 42     |
|                         | % |  | 97.6%    | 2.4%     | 100.0% |
| 2018                    | N |  | 54       | 5        | 59     |
|                         | % |  | 91.5%    | 8.5%     | 100.0% |
| 2019                    | N |  | 67       | 4        | 71     |
|                         | % |  | 94.4%    | 5.6%     | 100.0% |
| 2020                    | N |  | 70       | 10       | 80     |
|                         | % |  | 87.5%    | 12.5%    | 100.0% |
| Total                   | N |  | 391      | 28       | 419    |
|                         | % |  | 93.3%    | 6.7%     | 100.0% |

a. Federal State = Mecklenburg Western Pomerania

Mecklenburg Western Pomerania: IFAT/ELISA

| Year * IFAT/ELISA <sup>a</sup> |   |  | IFAT/ELISA |          | total  |
|--------------------------------|---|--|------------|----------|--------|
| Year                           |   |  | negative   | positive |        |
| 2008                           | N |  | 18         | 4        | 22     |
|                                | % |  | 81.8%      | 18.2%    | 100.0% |
| 2009                           | N |  | 20         | 4        | 24     |
|                                | % |  | 83.3%      | 16.7%    | 100.0% |
| 2010                           | N |  | 17         | 4        | 21     |
|                                | % |  | 81.0%      | 19.0%    | 100.0% |
| 2011                           | N |  | 33         | 12       | 45     |
|                                | % |  | 73.3%      | 26.7%    | 100.0% |
| 2012                           | N |  | 34         | 10       | 44     |
|                                | % |  | 77.3%      | 22.7%    | 100.0% |
| 2013                           | N |  | 26         | 8        | 34     |
|                                | % |  | 76.5%      | 23.5%    | 100.0% |
| 2014                           | N |  | 36         | 5        | 41     |
|                                | % |  | 87.8%      | 12.2%    | 100.0% |
| 2015                           | N |  | 47         | 4        | 51     |
|                                | % |  | 92.2%      | 7.8%     | 100.0% |
| 2016                           | N |  | 50         | 9        | 59     |
|                                | % |  | 84.7%      | 15.3%    | 100.0% |
| 2017                           | N |  | 54         | 13       | 67     |
|                                | % |  | 80.6%      | 19.4%    | 100.0% |
| 2018                           | N |  | 46         | 31       | 77     |
|                                | % |  | 59.7%      | 40.3%    | 100.0% |
| 2019                           | N |  | 52         | 26       | 78     |
|                                | % |  | 66.7%      | 33.3%    | 100.0% |
| 2020                           | N |  | 85         | 28       | 113    |
|                                | % |  | 75.2%      | 24.8%    | 100.0% |
| Total                          | N |  | 518        | 158      | 676    |
|                                | % |  | 76.6%      | 23.4%    | 100.0% |

a. Federal State = Mecklenburg Western Pomerania

North Rhine Westphalia: PCR

| Year * PCR <sup>a</sup> |   |  | PCR      |          | total  |
|-------------------------|---|--|----------|----------|--------|
| Year                    |   |  | negative | positive |        |
| 2008                    | N |  | 264      | 10       | 274    |
|                         | % |  | 96.4%    | 3.6%     | 100.0% |
| 2009                    | N |  | 273      | 11       | 284    |
|                         | % |  | 96.1%    | 3.9%     | 100.0% |
| 2010                    | N |  | 297      | 10       | 307    |
|                         | % |  | 96.7%    | 3.3%     | 100.0% |
| 2011                    | N |  | 302      | 12       | 314    |
|                         | % |  | 96.2%    | 3.8%     | 100.0% |
| 2012                    | N |  | 320      | 11       | 331    |
|                         | % |  | 96.7%    | 3.3%     | 100.0% |
| 2013                    | N |  | 366      | 11       | 377    |
|                         | % |  | 97.1%    | 2.9%     | 100.0% |
| 2014                    | N |  | 421      | 17       | 438    |
|                         | % |  | 96.1%    | 3.9%     | 100.0% |
| 2015                    | N |  | 439      | 13       | 452    |
|                         | % |  | 97.1%    | 2.9%     | 100.0% |
| 2016                    | N |  | 478      | 30       | 508    |
|                         | % |  | 94.1%    | 5.9%     | 100.0% |
| 2017                    | N |  | 667      | 23       | 690    |
|                         | % |  | 96.7%    | 3.3%     | 100.0% |
| 2018                    | N |  | 595      | 26       | 621    |
|                         | % |  | 95.8%    | 4.2%     | 100.0% |
| 2019                    | N |  | 694      | 28       | 722    |
|                         | % |  | 96.1%    | 3.9%     | 100.0% |
| 2020                    | N |  | 771      | 35       | 806    |
|                         | % |  | 95.7%    | 4.3%     | 100.0% |
| Total                   | N |  | 5,887    | 237      | 6,124  |
|                         | % |  | 96.1%    | 3.9%     | 100.0% |

a. Federal State = North Rhine Westphalia

North Rhine Westphalia: IFAT/ELISA

| Year * IFAT/ELISA <sup>a</sup> |   |  | IFAT/ELISA |          | total  |
|--------------------------------|---|--|------------|----------|--------|
| Year                           |   |  | negative   | positive |        |
| 2008                           | N |  | 669        | 141      | 810    |
|                                | % |  | 82.6%      | 17.4%    | 100.0% |
| 2009                           | N |  | 916        | 312      | 1,228  |
|                                | % |  | 74.6%      | 25.4%    | 100.0% |
| 2010                           | N |  | 1,007      | 348      | 1,355  |
|                                | % |  | 74.3%      | 25.7%    | 100.0% |
| 2011                           | N |  | 1,124      | 413      | 1,537  |
|                                | % |  | 73.1%      | 26.9%    | 100.0% |
| 2012                           | N |  | 1,360      | 444      | 1,804  |
|                                | % |  | 75.4%      | 24.6%    | 100.0% |
| 2013                           | N |  | 1,571      | 439      | 2,010  |
|                                | % |  | 78.2%      | 21.8%    | 100.0% |
| 2014                           | N |  | 2,032      | 477      | 2,509  |
|                                | % |  | 81.0%      | 19.0%    | 100.0% |
| 2015                           | N |  | 2,055      | 280      | 2,335  |
|                                | % |  | 88.0%      | 12.0%    | 100.0% |
| 2016                           | N |  | 1,826      | 351      | 2,177  |
|                                | % |  | 83.9%      | 16.1%    | 100.0% |
| 2017                           | N |  | 1,785      | 978      | 2,763  |
|                                | % |  | 64.6%      | 35.4%    | 100.0% |
| 2018                           | N |  | 1,634      | 876      | 2,510  |
|                                | % |  | 65.1%      | 34.9%    | 100.0% |
| 2019                           | N |  | 1,871      | 819      | 2,690  |
|                                | % |  | 69.6%      | 30.4%    | 100.0% |
| 2020                           | N |  | 2,023      | 1,035    | 3,058  |
|                                | % |  | 66.2%      | 33.8%    | 100.0% |
| Total                          | N |  | 19,873     | 6,913    | 26,786 |
|                                | % |  | 74.2%      | 25.8%    | 100.0% |

a. Federal State = North Rhine Westphalia

# Rhineland Palatinate: PCR

| Year * PCR <sup>a</sup> |   |  | PCR      |          | total  |
|-------------------------|---|--|----------|----------|--------|
| Year                    |   |  | negative | positive |        |
| 2008                    | N |  | 58       | 2        | 60     |
|                         | % |  | 96.7%    | 3.3%     | 100.0% |
| 2009                    | N |  | 82       | 3        | 85     |
|                         | % |  | 96.5%    | 3.5%     | 100.0% |
| 2010                    | N |  | 91       | 5        | 96     |
|                         | % |  | 94.8%    | 5.2%     | 100.0% |
| 2011                    | N |  | 73       | 1        | 74     |
|                         | % |  | 98.6%    | 1.4%     | 100.0% |
| 2012                    | N |  | 75       | 1        | 76     |
|                         | % |  | 98.7%    | 1.3%     | 100.0% |
| 2013                    | N |  | 76       | 2        | 78     |
|                         | % |  | 97.4%    | 2.6%     | 100.0% |
| 2014                    | N |  | 126      | 2        | 128    |
|                         | % |  | 98.4%    | 1.6%     | 100.0% |
| 2015                    | N |  | 108      | 3        | 111    |
|                         | % |  | 97.3%    | 2.7%     | 100.0% |
| 2016                    | N |  | 128      | 2        | 130    |
|                         | % |  | 98.5%    | 1.5%     | 100.0% |
| 2017                    | N |  | 170      | 11       | 181    |
|                         | % |  | 93.9%    | 6.1%     | 100.0% |
| 2018                    | N |  | 221      | 4        | 225    |
|                         | % |  | 98.2%    | 1.8%     | 100.0% |
| 2019                    | N |  | 235      | 12       | 247    |
|                         | % |  | 95.1%    | 4.9%     | 100.0% |
| 2020                    | N |  | 236      | 7        | 243    |
|                         | % |  | 97.1%    | 2.9%     | 100.0% |
| Total                   | N |  | 1,679    | 55       | 1,734  |
|                         | % |  | 96.8%    | 3.2%     | 100.0% |

a. Federal State = Rhineland Palatinate

Rhineland Palatinate: IFAT/ELISA

| Year * IFAT/ELISA <sup>a</sup> |      |   | IFAT/ELISA |          | total  |
|--------------------------------|------|---|------------|----------|--------|
|                                |      |   | negative   | positive |        |
| Year                           | 2008 | N | 140        | 15       | 155    |
|                                |      | % | 90.3%      | 9.7%     | 100.0% |
|                                | 2009 | N | 199        | 51       | 250    |
|                                |      | % | 79.6%      | 20.4%    | 100.0% |
|                                | 2010 | N | 229        | 66       | 295    |
|                                |      | % | 77.6%      | 22.4%    | 100.0% |
|                                | 2011 | N | 234        | 78       | 312    |
|                                |      | % | 75.0%      | 25.0%    | 100.0% |
|                                | 2012 | N | 393        | 79       | 472    |
|                                |      | % | 83.3%      | 16.7%    | 100.0% |
|                                | 2013 | N | 374        | 84       | 458    |
|                                |      | % | 81.7%      | 18.3%    | 100.0% |
|                                | 2014 | N | 438        | 78       | 516    |
|                                |      | % | 84.9%      | 15.1%    | 100.0% |
|                                | 2015 | N | 497        | 42       | 539    |
|                                |      | % | 92.2%      | 7.8%     | 100.0% |
|                                | 2016 | N | 428        | 51       | 479    |
|                                |      | % | 89.4%      | 10.6%    | 100.0% |
|                                | 2017 | N | 468        | 223      | 691    |
|                                |      | % | 67.7%      | 32.3%    | 100.0% |
|                                | 2018 | N | 490        | 180      | 670    |
|                                |      | % | 73.1%      | 26.9%    | 100.0% |
|                                | 2019 | N | 504        | 188      | 692    |
|                                |      | % | 72.8%      | 27.2%    | 100.0% |
|                                | 2020 | N | 534        | 223      | 757    |
|                                |      | % | 70.5%      | 29.5%    | 100.0% |
| Total                          |      | N | 4,928      | 1,358    | 6,286  |
|                                |      | % | 78.4%      | 21.6%    | 100.0% |

a. Federal State = Rhineland Palatinate



Saarland: PCR

| Year * PCR <sup>a</sup> |   |  | PCR      |          | total  |
|-------------------------|---|--|----------|----------|--------|
| Year                    |   |  | negative | positive |        |
| 2008                    | N |  | 38       | 3        | 41     |
|                         | % |  | 92,7%    | 7,3%     | 100,0% |
| 2009                    | N |  | 41       | 0        | 41     |
|                         | % |  | 100,0%   | 0,0%     | 100,0% |
| 2010                    | N |  | 45       | 2        | 47     |
|                         | % |  | 95,7%    | 4,3%     | 100,0% |
| 2011                    | N |  | 53       | 4        | 57     |
|                         | % |  | 93,0%    | 7,0%     | 100,0% |
| 2012                    | N |  | 73       | 4        | 77     |
|                         | % |  | 94,8%    | 5,2%     | 100,0% |
| 2013                    | N |  | 68       | 3        | 71     |
|                         | % |  | 95,8%    | 4,2%     | 100,0% |
| 2014                    | N |  | 128      | 5        | 133    |
|                         | % |  | 96,2%    | 3,8%     | 100,0% |
| 2015                    | N |  | 52       | 0        | 52     |
|                         | % |  | 100,0%   | 0,0%     | 100,0% |
| 2016                    | N |  | 30       | 1        | 31     |
|                         | % |  | 96,8%    | 3,2%     | 100,0% |
| 2017                    | N |  | 32       | 0        | 32     |
|                         | % |  | 100,0%   | 0,0%     | 100,0% |
| 2018                    | N |  | 50       | 0        | 50     |
|                         | % |  | 100,0%   | 0,0%     | 100,0% |
| 2019                    | N |  | 68       | 3        | 71     |
|                         | % |  | 95,8%    | 4,2%     | 100,0% |
| 2020                    | N |  | 42       | 3        | 45     |
|                         | % |  | 93,3%    | 6,7%     | 100,0% |
| Total                   |   |  | 720      | 28       | 748    |
|                         |   |  | 96.3%    | 3,7%     | 100,0% |

a. Federal State = Saarland

Saarland: IFAT/ELISA

| Year * IFAT/ELISA <sup>a</sup> |      |   | Antikörpernachweis |          | total  |
|--------------------------------|------|---|--------------------|----------|--------|
|                                |      |   | negative           | positive |        |
| Year                           | 2008 | N | 128                | 36       | 164    |
|                                |      | % | 78.0%              | 22.0%    | 100.0% |
|                                | 2009 | N | 144                | 59       | 203    |
|                                |      | % | 70.9%              | 29.1%    | 100.0% |
|                                | 2010 | N | 104                | 87       | 191    |
|                                |      | % | 54.5%              | 45.5%    | 100.0% |
|                                | 2011 | N | 136                | 63       | 199    |
|                                |      | % | 68.3%              | 31.7%    | 100.0% |
|                                | 2012 | N | 153                | 75       | 228    |
|                                |      | % | 67.1%              | 32.9%    | 100.0% |
|                                | 2013 | N | 120                | 42       | 162    |
|                                |      | % | 74.1%              | 25.9%    | 100.0% |
|                                | 2014 | N | 158                | 43       | 201    |
|                                |      | % | 78.6%              | 21.4%    | 100.0% |
|                                | 2015 | N | 104                | 18       | 122    |
|                                |      | % | 85.2%              | 14.8%    | 100.0% |
|                                | 2016 | N | 102                | 21       | 123    |
|                                |      | % | 82.9%              | 17.1%    | 100.0% |
|                                | 2017 | N | 93                 | 40       | 133    |
|                                |      | % | 69.9%              | 30.1%    | 100.0% |
|                                | 2018 | N | 97                 | 68       | 165    |
|                                |      | % | 58.8%              | 41.2%    | 100.0% |
|                                | 2019 | N | 120                | 61       | 181    |
|                                |      | % | 66.3%              | 33.7%    | 100.0% |
|                                | 2020 | N | 85                 | 59       | 144    |
|                                |      | % | 59.0%              | 41.0%    | 100.0% |
| Total                          |      |   | 1,544              | 672      | 2,216  |
|                                |      |   | 69.7%              | 30.3%    | 100.0% |

a. Federal State = Saarland

Saxony: PCR

| Year * PCR <sup>a</sup> |   |  | PCR      |          | total  |
|-------------------------|---|--|----------|----------|--------|
| Year                    |   |  | negative | positive |        |
| 2008                    | N |  | 27       | 3        | 30     |
|                         | % |  | 90.0%    | 10.0%    | 100.0% |
| 2009                    | N |  | 86       | 3        | 89     |
|                         | % |  | 96.6%    | 3.4%     | 100.0% |
| 2010                    | N |  | 100      | 2        | 102    |
|                         | % |  | 98.0%    | 2.0%     | 100.0% |
| 2011                    | N |  | 55       | 1        | 56     |
|                         | % |  | 98.2%    | 1.8%     | 100.0% |
| 2012                    | N |  | 39       | 6        | 45     |
|                         | % |  | 86.7%    | 13.3%    | 100.0% |
| 2013                    | N |  | 49       | 1        | 50     |
|                         | % |  | 98.0%    | 2.0%     | 100.0% |
| 2014                    | N |  | 35       | 2        | 37     |
|                         | % |  | 94.6%    | 5.4%     | 100.0% |
| 2015                    | N |  | 53       | 3        | 56     |
|                         | % |  | 94.6%    | 5.4%     | 100.0% |
| 2016                    | N |  | 88       | 6        | 94     |
|                         | % |  | 93.6%    | 6.4%     | 100.0% |
| 2017                    | N |  | 93       | 13       | 106    |
|                         | % |  | 87.7%    | 12.3%    | 100.0% |
| 2018                    | N |  | 74       | 9        | 83     |
|                         | % |  | 89.2%    | 10.8%    | 100.0% |
| 2019                    | N |  | 121      | 17       | 138    |
|                         | % |  | 87.7%    | 12.3%    | 100.0% |
| 2020                    | N |  | 110      | 10       | 120    |
|                         | % |  | 91.7%    | 8.3%     | 100.0% |
| Total                   | N |  | 930      | 76       | 1,006  |
|                         | % |  | 92.4%    | 7.6%     | 100.0% |

a. Federal State = Saxony

Saxony: IFAT/ELISA

| Year * IFAT/ELISA <sup>a</sup> |      |   | IFAT/ELISA |          | total  |
|--------------------------------|------|---|------------|----------|--------|
|                                |      |   | negative   | positive |        |
| Year                           | 2008 | N | 110        | 23       | 133    |
|                                |      | % | 82.7%      | 17.3%    | 100.0% |
|                                | 2009 | N | 102        | 27       | 129    |
|                                |      | % | 79.1%      | 20.9%    | 100.0% |
|                                | 2010 | N | 82         | 16       | 98     |
|                                |      | % | 83.7%      | 16.3%    | 100.0% |
|                                | 2011 | N | 84         | 37       | 121    |
|                                |      | % | 69.4%      | 30.6%    | 100.0% |
|                                | 2012 | N | 112        | 19       | 131    |
|                                |      | % | 85.5%      | 14.5%    | 100.0% |
|                                | 2013 | N | 100        | 34       | 134    |
|                                |      | % | 74.6%      | 25.4%    | 100.0% |
|                                | 2014 | N | 126        | 31       | 157    |
|                                |      | % | 80.3%      | 19.7%    | 100.0% |
|                                | 2015 | N | 129        | 20       | 149    |
|                                |      | % | 86.6%      | 13.4%    | 100.0% |
|                                | 2016 | N | 99         | 31       | 130    |
|                                |      | % | 76.2%      | 23.8%    | 100.0% |
|                                | 2017 | N | 96         | 69       | 165    |
|                                |      | % | 58.2%      | 41.8%    | 100.0% |
|                                | 2018 | N | 84         | 55       | 139    |
|                                |      | % | 60.4%      | 39.6%    | 100.0% |
|                                | 2019 | N | 113        | 56       | 169    |
|                                |      | % | 66.9%      | 33.1%    | 100.0% |
|                                | 2020 | N | 109        | 53       | 162    |
|                                |      | % | 67.3%      | 32.7%    | 100.0% |
| Total                          |      | N | 1,346      | 471      | 1,817  |
|                                |      | % | 74.1%      | 25.9%    | 100.0% |

a. Federal State = Saxony

Saxony-Anhalt: PCR

| Year * PCR <sup>a</sup> |   |  | PCR      |          | total  |
|-------------------------|---|--|----------|----------|--------|
| Year                    |   |  | negative | positive |        |
| 2008                    | N |  | 12       | 1        | 13     |
|                         | % |  | 92.3%    | 7.7%     | 100.0% |
| 2009                    | N |  | 13       | 0        | 13     |
|                         | % |  | 100.0%   | 0.0%     | 100.0% |
| 2010                    | N |  | 24       | 2        | 26     |
|                         | % |  | 92.3%    | 7.7%     | 100.0% |
| 2011                    | N |  | 17       | 1        | 18     |
|                         | % |  | 94.4%    | 5.6%     | 100.0% |
| 2012                    | N |  | 11       | 0        | 11     |
|                         | % |  | 100.0%   | 0.0%     | 100.0% |
| 2013                    | N |  | 13       | 0        | 13     |
|                         | % |  | 100.0%   | 0.0%     | 100.0% |
| 2014                    | N |  | 20       | 2        | 22     |
|                         | % |  | 90.9%    | 9.1%     | 100.0% |
| 2015                    | N |  | 29       | 1        | 30     |
|                         | % |  | 96.7%    | 3.3%     | 100.0% |
| 2016                    | N |  | 35       | 0        | 35     |
|                         | % |  | 100.0%   | 0.0%     | 100.0% |
| 2017                    | N |  | 21       | 2        | 23     |
|                         | % |  | 91.3%    | 8.7%     | 100.0% |
| 2018                    | N |  | 34       | 2        | 36     |
|                         | % |  | 94.4%    | 5.6%     | 100.0% |
| 2019                    | N |  | 56       | 3        | 59     |
|                         | % |  | 94.9%    | 5.1%     | 100.0% |
| 2020                    | N |  | 82       | 2        | 84     |
|                         | % |  | 97.6%    | 2.4%     | 100.0% |
| Total                   | N |  | 367      | 16       | 383    |
|                         | % |  | 95.8%    | 4.2%     | 100.0% |

a. Federal State = Saxony-Anhalt

Saxony-Anhalt: IFAT/ELISA

| Year * IFAT/ELISA <sup>a</sup> |      |   | IFAT/ELISA |          | total  |
|--------------------------------|------|---|------------|----------|--------|
|                                |      |   | negative   | positive |        |
| Year                           | 2008 | N | 27         | 1        | 28     |
|                                |      | % | 96.4%      | 3.6%     | 100.0% |
|                                | 2009 | N | 9          | 7        | 16     |
|                                |      | % | 56.3%      | 43.8%    | 100.0% |
|                                | 2010 | N | 28         | 8        | 36     |
|                                |      | % | 77.8%      | 22.2%    | 100.0% |
|                                | 2011 | N | 24         | 10       | 34     |
|                                |      | % | 70.6%      | 29.4%    | 100.0% |
|                                | 2012 | N | 36         | 9        | 45     |
|                                |      | % | 80.0%      | 20.0%    | 100.0% |
|                                | 2013 | N | 41         | 6        | 47     |
|                                |      | % | 87.2%      | 12.8%    | 100.0% |
|                                | 2014 | N | 81         | 22       | 103    |
|                                |      | % | 78.6%      | 21.4%    | 100.0% |
|                                | 2015 | N | 67         | 10       | 77     |
|                                |      | % | 87.0%      | 13.0%    | 100.0% |
|                                | 2016 | N | 72         | 16       | 88     |
|                                |      | % | 81.8%      | 18.2%    | 100.0% |
|                                | 2017 | N | 59         | 51       | 110    |
|                                |      | % | 53.6%      | 46.4%    | 100.0% |
|                                | 2018 | N | 69         | 34       | 103    |
|                                |      | % | 67.0%      | 33.0%    | 100.0% |
|                                | 2019 | N | 60         | 44       | 104    |
|                                |      | % | 57.7%      | 42.3%    | 100.0% |
|                                | 2020 | N | 84         | 55       | 139    |
|                                |      | % | 60.4%      | 39.6%    | 100.0% |
| Total                          |      | N | 657        | 273      | 930    |
|                                |      | % | 70.6%      | 29.4%    | 100.0% |

a. Federal State = Saxony-Anhalt

Schleswig Holstein/Hamburg: PCR

| Year * PCR <sup>a</sup> |   |  | PCR      |          | total  |
|-------------------------|---|--|----------|----------|--------|
| Year                    |   |  | negative | positive |        |
| 2008                    | N |  | 41       | 0        | 41     |
|                         | % |  | 100.0%   | 0.0%     | 100.0% |
| 2009                    | N |  | 44       | 5        | 49     |
|                         | % |  | 89.8%    | 10.2%    | 100.0% |
| 2010                    | N |  | 76       | 0        | 76     |
|                         | % |  | 100.0%   | 0.0%     | 100.0% |
| 2011                    | N |  | 58       | 3        | 61     |
|                         | % |  | 95.1%    | 4.9%     | 100.0% |
| 2012                    | N |  | 58       | 5        | 63     |
|                         | % |  | 92.1%    | 7.9%     | 100.0% |
| 2013                    | N |  | 54       | 1        | 55     |
|                         | % |  | 98.2%    | 1.8%     | 100.0% |
| 2014                    | N |  | 73       | 3        | 76     |
|                         | % |  | 96.1%    | 3.9%     | 100.0% |
| 2015                    | N |  | 67       | 4        | 71     |
|                         | % |  | 94.4%    | 5.6%     | 100.0% |
| 2016                    | N |  | 91       | 5        | 96     |
|                         | % |  | 94.8%    | 5.2%     | 100.0% |
| 2017                    | N |  | 100      | 7        | 107    |
|                         | % |  | 93.5%    | 6.5%     | 100.0% |
| 2018                    | N |  | 103      | 4        | 107    |
|                         | % |  | 96.3%    | 3.7%     | 100.0% |
| 2019                    | N |  | 101      | 9        | 110    |
|                         | % |  | 91.8%    | 8.2%     | 100.0% |
| 2020                    | N |  | 133      | 6        | 139    |
|                         | % |  | 95.7%    | 4.3%     | 100.0% |
| Total                   | N |  | 999      | 52       | 1,051  |
|                         | % |  | 95.1%    | 4.9%     | 100.0% |

a. Federal State = Schleswig-Holstein/Hamburg

Schleswig Holstein/Hamburg: IFAT/ELISA

| Year * IFAT/ELISA <sup>a</sup> |      |   | IFAT/ELISA |          | total  |
|--------------------------------|------|---|------------|----------|--------|
|                                |      |   | negative   | positive |        |
| Year                           | 2008 | N | 100        | 35       | 135    |
|                                |      | % | 74.1%      | 25.9%    | 100.0% |
|                                | 2009 | N | 150        | 47       | 197    |
|                                |      | % | 76.1%      | 23.9%    | 100.0% |
|                                | 2010 | N | 173        | 92       | 265    |
|                                |      | % | 65.3%      | 34.7%    | 100.0% |
|                                | 2011 | N | 207        | 67       | 274    |
|                                |      | % | 75.5%      | 24.5%    | 100.0% |
|                                | 2012 | N | 204        | 88       | 292    |
|                                |      | % | 69.9%      | 30.1%    | 100.0% |
|                                | 2013 | N | 236        | 104      | 340    |
|                                |      | % | 69.4%      | 30.6%    | 100.0% |
|                                | 2014 | N | 333        | 91       | 424    |
|                                |      | % | 78.5%      | 21.5%    | 100.0% |
|                                | 2015 | N | 300        | 41       | 341    |
|                                |      | % | 88.0%      | 12.0%    | 100.0% |
|                                | 2016 | N | 211        | 44       | 255    |
|                                |      | % | 82.7%      | 17.3%    | 100.0% |
|                                | 2017 | N | 219        | 143      | 362    |
|                                |      | % | 60.5%      | 39.5%    | 100.0% |
|                                | 2018 | N | 226        | 131      | 357    |
|                                |      | % | 63.3%      | 36.7%    | 100.0% |
|                                | 2019 | N | 214        | 110      | 324    |
|                                |      | % | 66.0%      | 34.0%    | 100.0% |
|                                | 2020 | N | 297        | 183      | 480    |
|                                |      | % | 61.9%      | 38.1%    | 100.0% |
| Total                          |      | N | 2,870      | 1,176    | 4,046  |
|                                |      | % | 70.9%      | 29.1%    | 100.0% |

a. Federal State = Schleswig-Holstein/Hamburg



Thuringia: PCR

| Year * PCR <sup>a</sup> |   |  | PCR      |          | total  |
|-------------------------|---|--|----------|----------|--------|
| Year                    |   |  | negative | positive |        |
| 2008                    | N |  | 4        | 0        | 4      |
|                         | % |  | 100.0%   | 0.0%     | 100.0% |
| 2009                    | N |  | 14       | 3        | 17     |
|                         | % |  | 82.4%    | 17.6%    | 100.0% |
| 2010                    | N |  | 15       | 0        | 15     |
|                         | % |  | 100.0%   | 0.0%     | 100.0% |
| 2011                    | N |  | 21       | 2        | 23     |
|                         | % |  | 91.3%    | 8.7%     | 100.0% |
| 2012                    | N |  | 8        | 0        | 8      |
|                         | % |  | 100.0%   | 0.0%     | 100.0% |
| 2013                    | N |  | 15       | 1        | 16     |
|                         | % |  | 93.8%    | 6.3%     | 100.0% |
| 2014                    | N |  | 17       | 2        | 19     |
|                         | % |  | 89.5%    | 10.5%    | 100.0% |
| 2015                    | N |  | 36       | 7        | 43     |
|                         | % |  | 83.7%    | 16.3%    | 100.0% |
| 2016                    | N |  | 53       | 2        | 55     |
|                         | % |  | 96.4%    | 3.6%     | 100.0% |
| 2017                    | N |  | 63       | 6        | 69     |
|                         | % |  | 91.3%    | 8.7%     | 100.0% |
| 2018                    | N |  | 36       | 3        | 39     |
|                         | % |  | 92.3%    | 7.7%     | 100.0% |
| 2019                    | N |  | 50       | 2        | 52     |
|                         | % |  | 96.2%    | 3.8%     | 100.0% |
| 2020                    | N |  | 57       | 3        | 60     |
|                         | % |  | 95.0%    | 5.0%     | 100.0% |
| Total                   | N |  | 389      | 31       | 420    |
|                         | % |  | 92.6%    | 7.4%     | 100.0% |

a. Federal State = Thuringia

Thuringia: IFAT/ELISA

| Year * IFAT/ELISA <sup>a</sup> |      |   | IFAT/ELISA |          | total  |
|--------------------------------|------|---|------------|----------|--------|
|                                |      |   | negative   | positive |        |
| Year                           | 2008 | N | 20         | 3        | 23     |
|                                |      | % | 87.0%      | 13.0%    | 100.0% |
|                                | 2009 | N | 23         | 8        | 31     |
|                                |      | % | 74.2%      | 25.8%    | 100.0% |
|                                | 2010 | N | 34         | 14       | 48     |
|                                |      | % | 70.8%      | 29.2%    | 100.0% |
|                                | 2011 | N | 69         | 27       | 96     |
|                                |      | % | 71.9%      | 28.1%    | 100.0% |
|                                | 2012 | N | 72         | 18       | 90     |
|                                |      | % | 80.0%      | 20.0%    | 100.0% |
|                                | 2013 | N | 68         | 28       | 96     |
|                                |      | % | 70.8%      | 29.2%    | 100.0% |
|                                | 2014 | N | 67         | 9        | 76     |
|                                |      | % | 88.2%      | 11.8%    | 100.0% |
|                                | 2015 | N | 78         | 15       | 93     |
|                                |      | % | 83.9%      | 16.1%    | 100.0% |
|                                | 2016 | N | 80         | 25       | 105    |
|                                |      | % | 76.2%      | 23.8%    | 100.0% |
|                                | 2017 | N | 69         | 44       | 113    |
|                                |      | % | 61.1%      | 38.9%    | 100.0% |
|                                | 2018 | N | 61         | 46       | 107    |
|                                |      | % | 57.0%      | 43.0%    | 100.0% |
|                                | 2019 | N | 73         | 41       | 114    |
|                                |      | % | 64.0%      | 36.0%    | 100.0% |
|                                | 2020 | N | 113        | 61       | 174    |
|                                |      | % | 64.9%      | 35.1%    | 100.0% |
| Total                          |      | N | 827        | 339      | 1,166  |
|                                |      | % | 70.9%      | 29.1%    | 100.0% |

a. Federal State = Thuringia
